# Supplementary material for: Fullerene-free polymer solar cells processed from non-halogenated solvents in air with PCE of 4.8%
Source: Royal Society of Chemistry journal article supplement (doi:10.1039/c6cc08939a), 2016-12-21
Supplement: c6cc08939a1.pdf [file c6cc08939a1.pdf]

## SUPPORTING INFORMATION

### Fullerene-Free Polymer Solar Cells Processed from Non-Halogenated Solvents in Air with PCE of 4.8%

Sergey V Dayneko, Arthur D Hendsbee, Gregory C Welch\*

*Department of Chemistry  
University of Calgary, 731 Campus Place NW  
Calgary, Alberta, Canada T2N 1N4  
gregory.welch@ucalgary.ca*

#### Materials

All materials were purchased from Aldrich Chemicals and used as received. Polymer **PTB7-Th** was purchased from One-Material and used as received. The energy levels of **PTB7-Th** were estimated in house, in an identical fashion to **tPDI-Hex**, using solution cyclic voltammetry.

#### Equipment

UV-vis absorption measurements were carried out on an Agilent Technologies Cary 60 UV-vis spectrometer at room temperature. The photoluminescence spectra measurements were recorded using an Agilent Technologies Cary Eclipse fluorescence spectrophotometer at room temperature. Atomic force microscopy (AFM) images were obtained using a TT2-AFM (AFM workshop) in the tapping mode and a WSxM software.

#### Experimental Section

*Solar Cells Fabrication and Testing:* Solar cells were fabricated on ITO-coated glass substrates, which were first cleaned by sequentially ultra-sonicating detergent and de-ionized water, acetone, and then isopropanol before use. ITO substrates were first pretreated UV-ozone for 30 minutes, then, ZnO precursor solution was spin-cast onto the ITO substrate at a speed of 4000 rpm and then annealed at 200 °C in air for 1 hour. Active layer solutions (**PTB7-Th:tPDI-Hex**

weight ratios 2:3 or 3:7) were prepared in chloroform (CF), 2-methyl tetrahydrofuran (2Me-THF), *o*-Xylene, or 1,2,4-trimethylbenzene (TMB) without any additives. The total concentration of mixed **PTB7-Th:tPDI-Hex** is 10 mg ml<sup>-1</sup> was for CF, 2Me-THF, and *o*-Xylene solvents and 15 mg 10 mg ml<sup>-1</sup> for TMB. For CF, 2Me-THF, and TMB solvents, the films giving best device PCE were spin-coated at room temperature at 1500 rpm in air. Active layers from *o*-Xylene with best device PCE were spin-coated at 600 rpm. The substrates were then kept in an N<sub>2</sub> atmosphere glovebox overnight before evaporating MoO<sub>x</sub> and Ag. The evaporation of 10 nm of MoO<sub>x</sub> followed by 100 nm of Ag were thermally deposited under vacuum (4x10<sup>-6</sup> Torr). Current density-voltage (J-V) characteristics were measured using a Keithley 2420 Source Measure Unit. Solar cell performance used an Air Mass 1.5 Global (AM 1.5G) Solar Simulator (Newport, Model 92251A-1000) with an irradiation intensity of 100 mW cm<sup>-2</sup>, which was measured by a calibrated silicon solar cell and a readout meter (Newport, Model 91150V). EQE spectra were measured by using a QEX7 Solar Cell Spectral Response/QE/IPCE Measurement System (PV Measurement, Model QEX7) with an optical lens to focus the light into an area about 0.04 cm<sup>2</sup>, smaller than the dot cell. The silicon photodiode was used to calibration of the EQE measurement system in the wavelength range from 300 to 1100 nm.

## Supporting Figures

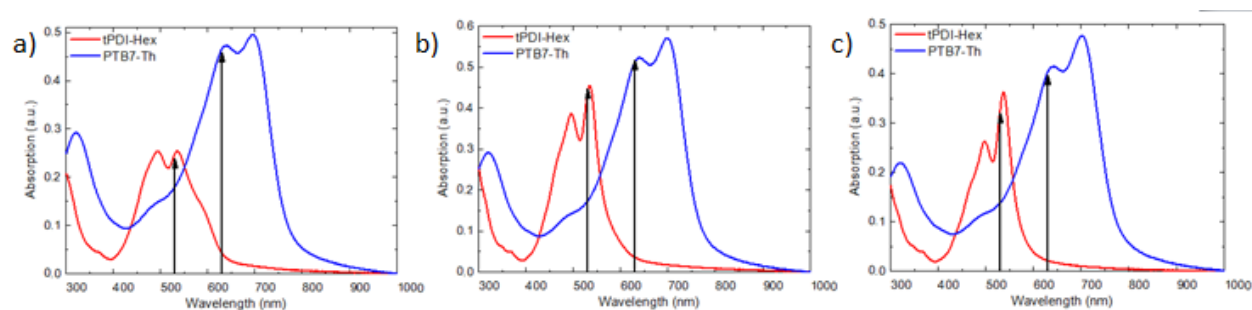

**Figure 1SI.** a) Absorption spectra of **PTB7-Th** and **tPDI-Hex** films obtained from CF, b) 2Me-THF and c) *o*-Xylene (the arrows indicate the length of the excitation waves 530 and 630 nm).

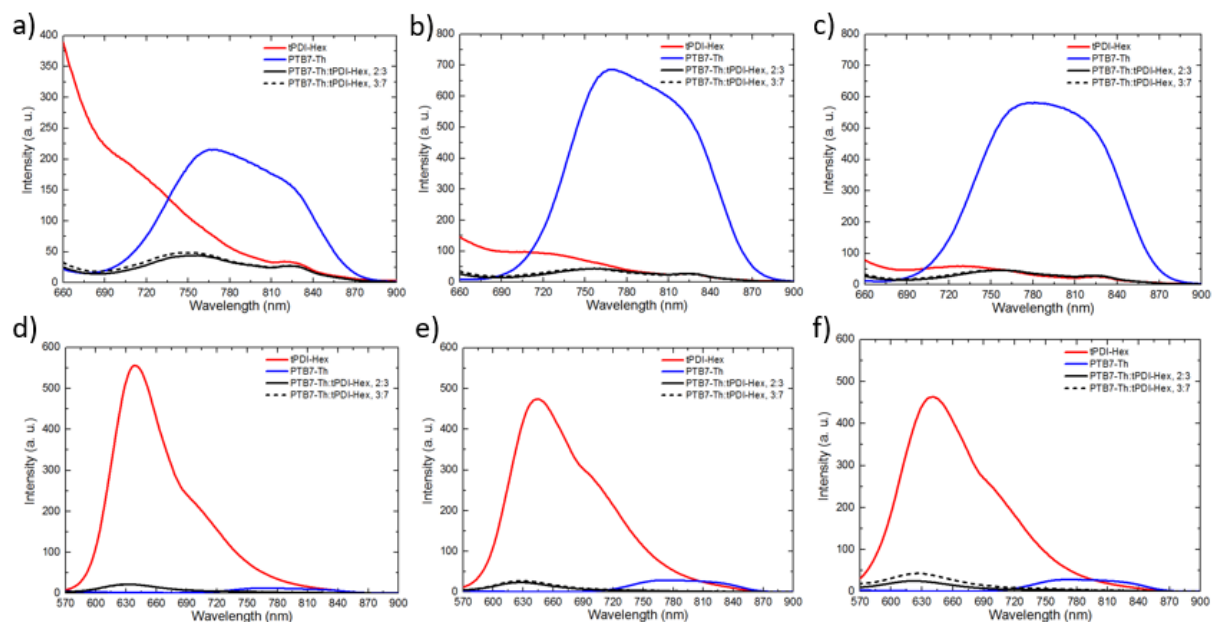

**Figure 2SI.** **a)** The normalized photoluminescence spectra of **tPDI-Hex**, **PTB7-Th** and BHJ films with 2:3 and 3:7 ratios obtained from CF, **b)** 2Me-THF and **c)** *o*-Xylene at excitation wavelength 630 nm. **d)** The normalized photoluminescence spectra of **tPDI-Hex**, **PTB7-Th** and BHJ films with 2:3 and 3:7 ratios obtained from CF, **e)** 2Me-THF and **f)** *o*-Xylene at excitation wavelength 530 nm.

**Table S1.** Solvent Comparison Table.

| Solvent                 | Chemical Structure                                                                | <sup>a</sup> Boiling Point (°C) | <sup>b</sup> Dipole Moment (Debye) | <sup>a</sup> Specific Gravity (Water = 1) | <sup>a</sup> Vapor Pressure (@20C, kPa) | List Price (Aldrich Cat. No., \$ CAD) | <sup>a</sup> Toxicity (LD50, mg/kg, rat) | <sup>a</sup> Advantages                          | <sup>a</sup> Disadvantages                                |
|-------------------------|-----------------------------------------------------------------------------------|---------------------------------|------------------------------------|-------------------------------------------|-----------------------------------------|---------------------------------------|------------------------------------------|--------------------------------------------------|-----------------------------------------------------------|
| Chloroform              | 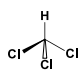 | 61                              | 1.01                               | 1.48                                      | 21.1                                    | (C2432-1L, <b>80 \$</b> )             | 695                                      | Canonical use, Dissolves many organic compounds. | Volatile, Halogenated Solvent. Toxic, Carcinogen, Mutagen |
| O-Xylene                | 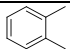 | 144                             | 0.62                               | 0.88                                      | 0.90                                    | (294780-2L, <b>199 \$</b> )           | 1364                                     | High B.P, non-halogenated, Biodegradable         | Flammable, Carcinogen, Teratogen                          |
| 2-Me-THF                | 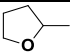 | 80                              | <sup>c</sup> 1.38                  | 0.86                                      | 20.7*                                   | (414247-1L, <b>211.5 \$</b> )         | >2000                                    | <sup>c</sup> Derived from Biomass. Biodegradable | Flammable, Chronic Health effects.                        |
| 1,2,4-Trimethyl Benzene | 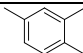 | 169-171                         | <sup>d</sup> 0.41                  | 0.88                                      | 2.80                                    | (T73601-2L, <b>116.50 \$</b> )        | 3280                                     | High BP, non-halogenated                         | Flammable, Toxic                                          |

<sup>a</sup> Data used in table taken from Materials Safety Data Sheets (MSDS) provided by chemical vendors. \* = data @ 25C.

<sup>b</sup> Data taken from: CRC Handbook of Chemistry and Physics (85th Edition).

<sup>c</sup> Data taken from: *Organic Process Research & Development* **2007** 11 (1), 156-159.

<sup>d</sup> Data taken from: *Phys. Chem.*, 1953, 57 (5), pp 538–540.

Note: Halogenated solvents have known impacts on the ozone layer and can be difficult to dispose of, due to the formation of halo-acids upon burning. <sup>1-3</sup>

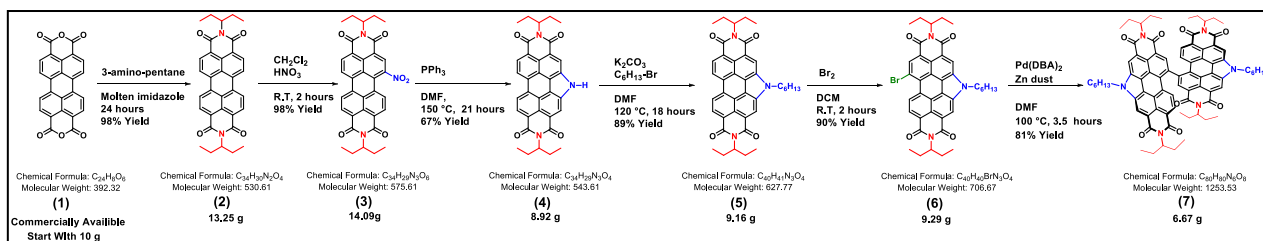

**Figure 3SI:** Synthetic route towards **tPDI-Hex** (compound **7**). Yields are assumed from a previous report for the purpose of performing a rough ‘cost analysis’ for the acceptor **tPDI-Hex** (**7**).<sup>4</sup> Starting with 10 g of the commercially available anhydride (**1**) and assuming the reported yields, 6.67 g of (**7**) can be obtained. Full synthetic details can be found in a previous publication from our group.<sup>4</sup>

**Table S2:** Cost analysis for the synthesis of 1 g of **tPDI-Hex** (compound **7**). All prices are in Canadian dollars and were taken from the list price on the Sigma-Aldrich.ca web site (<http://www.sigmaaldrich.com/canada-english.html>). In all cases, the largest quantity available was used to obtain a price. Estimated cost does not include labor.

| used in rxn    |              |                                               |               |              |               |                 |            |                 |                   |        |            |  |
|----------------|--------------|-----------------------------------------------|---------------|--------------|---------------|-----------------|------------|-----------------|-------------------|--------|------------|--|
| used in workup |              |                                               |               |              |               |                 |            |                 |                   |        |            |  |
| Product Code   | Used to make | Material                                      | SUPPLIER      | QTY SOLD (g) | PRICE (\$CAD) | PRICE/g (\$CAD) | molar mass | USED in rxn (g) | USED in rxn (mol) | Cost   | yields (g) |  |
| P11255-100G    | 2            | perylene-3,4,9,10-tetracarboxylic dianhydride | Sigma-Aldrich | 100          | 185           | 1.85            | 392.32     | 10.0            | 0.03              | 18.50  |            |  |
| 792527-1KG     | 2            | imidazole                                     | Sigma-Aldrich | 1000         | 319           | 0.32            | 68.08      | 307.5           | 4.52              | 98.09  |            |  |
| 190195-25G     | 2            | 1-ethylpropylamine                            | Sigma-Aldrich | 25           | 294           | 11.76           | 87.16      | 6.0             | 0.07              | 70.37  |            |  |
| 322415-20L-P2  | 2            | methanol                                      | Sigma-Aldrich | 15840        | 720           | 0.05            | 32.04      | 500.0           | 15.61             | 22.73  | 13.25      |  |
| 270997-18L-P1  | 3            | anhydrous dichloromethane                     | Sigma-Aldrich | 18000        | 697           | 0.04            | 84.93      | 798.0           | 9.40              | 30.90  |            |  |
| 309079-500ML   | 3            | concentrated nitric acid                      | Sigma-Aldrich | 740          | 840           | 1.14            | 63.01      | 25.0            | 0.40              | 28.38  |            |  |
| 676853-4X4L    | 3            | dichloromethane                               | Sigma-Aldrich | 21280        | 806           | 0.04            | 84.93      | 665.0           | 7.83              | 25.19  |            |  |
| 795429-2.5KG   | 3            | sodium hydroxide                              | Sigma-Aldrich | 2500         | 221           | 0.09            | 40         | 5.0             | 0.13              | 0.44   |            |  |
| 322415-20L-P2  | 3            | methanol                                      | Sigma-Aldrich | 15840        | 720           | 0.05            | 32.04      | 665.0           | 20.76             | 30.23  | 14.09      |  |
| 93092-1KG      | 4            | triphenylphosphine                            | Sigma-Aldrich | 10000        | 253           | 0.03            | 262.29     | 20.8            | 0.08              | 0.53   |            |  |
| 227056-18L     | 4            | dimethylformamide                             | Sigma-Aldrich | 16992        | 813           | 0.05            | 73.09      | 296.8           | 4.06              | 14.20  |            |  |
| 676853-4X4L    | 4            | dichloromethane                               | Sigma-Aldrich | 21280        | 806           | 0.04            | 84.93      | 313.6           | 3.69              | 11.88  |            |  |
| 227064-18L-P1  | 4            | hexanes                                       | Sigma-Aldrich | 11790        | 347           | 0.03            | 86.18      | 617.8           | 7.17              | 18.18  | 8.92       |  |
| 791776-12KG    | 5            | potassium carbonate                           | Sigma-Aldrich | 12000        | 1055          | 0.09            | 138.205    | 4.2             | 0.03              | 0.37   |            |  |
| 227056-18L     | 5            | dimethylformamide                             | Sigma-Aldrich | 16992        | 813           | 0.05            | 73.09      | 262.0           | 3.58              | 12.54  |            |  |
| 868240-1KG     | 5            | 1-bromohexane                                 | Sigma-Aldrich | 1000         | 138           | 0.14            | 165.07     | 4.0             | 0.02              | 0.56   |            |  |
| 676853-4X4L    | 5            | dichloromethane                               | Sigma-Aldrich | 21280        | 806           | 0.04            | 84.93      | 262.0           | 3.08              | 9.92   |            |  |
| 322415-20L-P2  | 5            | methanol                                      | Sigma-Aldrich | 15840        | 720           | 0.05            | 32.04      | 262.0           | 8.18              | 11.91  | 9.16       |  |
| 676853-4X4L    | 6            | dichloromethane                               | Sigma-Aldrich | 21280        | 806           | 0.04            | 84.93      | 468.8           | 5.52              | 17.76  |            |  |
| 207888-500G    | 6            | bromine                                       | Sigma-Aldrich | 500          | 160           | 0.32            | 159.81     | 56.4            | 0.35              | 18.05  |            |  |
| 322415-20L-P2  | 6            | methanol                                      | Sigma-Aldrich | 15840        | 720           | 0.05            | 32.04      | 282.0           | 8.80              | 12.82  |            |  |
| 227064-18L-P1  | 6            | hexanes                                       | Sigma-Aldrich | 11790        | 347           | 0.03            | 86.18      | 282.0           | 3.27              | 8.30   | 9.29       |  |
| 227994-50G     | 7            | Pd(DBA)2                                      | Sigma-Aldrich | 50           | 1375          | 27.50           | 575        | 0.9             | 1.62E-03          | 25.60  |            |  |
| 209988-9KG     | 7            | Zn Dust                                       | Sigma-Aldrich | 5000         | 393           | 0.08            | 65.38      | 4.2             | 0.06              | 0.33   |            |  |
| 227056-18L     | 7            | dimethylformamide                             | Sigma-Aldrich | 16992        | 813           | 0.05            | 73.09      | 878.9           | 12.02             | 42.05  |            |  |
| 20199-U        | 7            | Celite 545                                    | Sigma-Aldrich | 454          | 303           | 0.67            |            | 18.6            |                   | 1.33   |            |  |
| 676853-4X4L    | 7            | dichloromethane                               | Sigma-Aldrich | 21280        | 806           | 0.04            | 84.93      | 2000.0          | 23.55             | 75.75  |            |  |
| 362808-4L      | 7            | ethanol                                       | Sigma-Aldrich | 3156         | 136           | 0.04            | 60.1       | 2000.0          | 33.28             | 86.19  |            |  |
| 199443-20KG    | 7            | aluminum oxide                                | Sigma-Aldrich | 20000        | 701           | 0.04            | 101.96     | 186.2           | 1.83              | 6.53   | 6.67       |  |
|                |              |                                               |               |              |               |                 |            |                 | total (6.67 g)    | 699.61 |            |  |
|                |              |                                               |               |              |               |                 |            |                 | total (1 g)       | 104.89 |            |  |

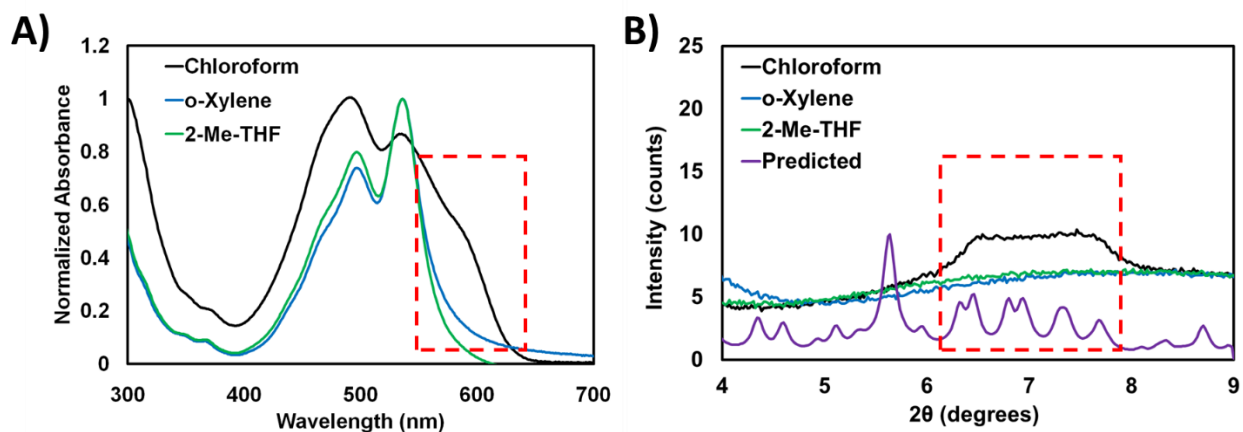

**Figure 4SI: A)** Optical absorption profiles of thin films of **tPDI-Hex** spin-cast from different solvents. All films were cast from 10 mg/mL solutions at 1500 rpm. The low energy shoulder that appears when cast from chloroform is highlighted using a red box. This feature is only visible in films of **tPDI-Hex** cast from chloroform, leading to the assertion that a different film morphology is attained when using this solvent. **B)** X-ray diffraction patterns of **tPDI-Hex** films. Films were drop- cast onto clean glass slides from different solvents as 10 mg/ml solutions and dried in air. The solvents used were: chloroform, *o*-Xylene, 2-Me-THF. All X-ray diffraction experiments were performed on a PROTO AXRD Benchtop Powder Diffractometer using  $\theta$ - $2\theta$  scans and Cu K- $\alpha$  radiation. Predicted powder pattern was generated from the previously reported crystal structure of **tPDI-Hex**.<sup>4</sup> It has been previously reported in the literature that the light absorptive properties of PDI molecules may become dramatically changed upon aggregation.<sup>5,6</sup> Taken together, the X-Ray data and UV-Visible absorption profiles of thin films provide qualitative evidence of a difference in morphology for films of **tPDI-Hex** cast from chloroform.

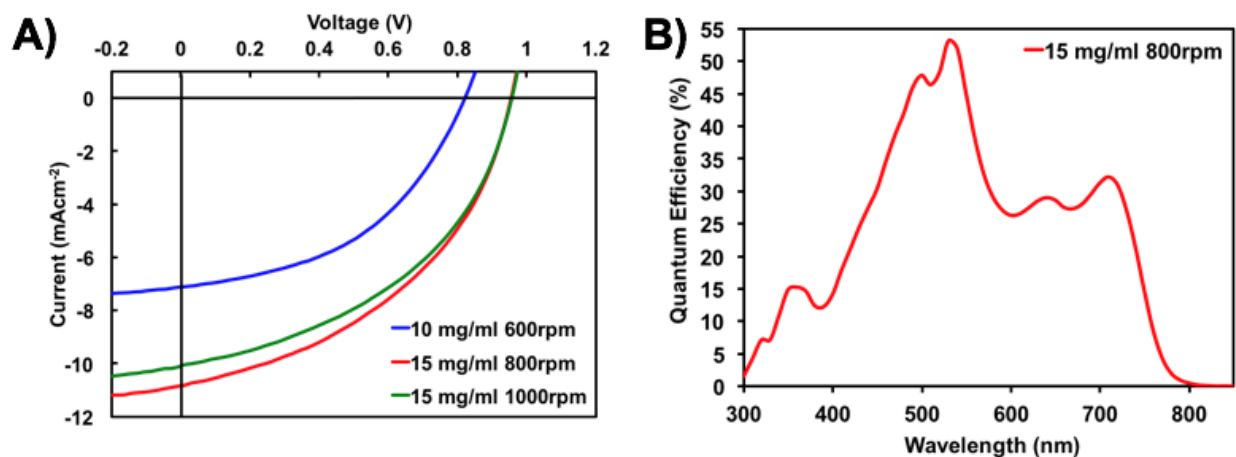

**Figure 5SI: A)** J-V characteristics of OSCs with an inverted structure based on **PTB7-Th:tPDI-Hex** blend films obtained from 1,2,4-Trimethyl Benzene (**TMB**) at 3:7 donor/acceptor ratios. Active layers were applied from the **TMB** at a total concentration of 10 and 15 mg/ml and at spin speeds of 600 and 800 or 1000rpm, respectively. OSC parameters are shown in the **Table S3**. The **PTB7-Th:tPDI-Hex** solar cell showed PCE of 4.6%, obtained at a concentration of 15 mg/ml, and 800 rpm. **B)** EQE spectrum of the best OSC with an inverted structure based on **PTB7-Th:tPDI-Hex** blend films obtained from chloroform **TMB** at 3:7 donor/acceptor ratios.

**Table S3.** Summary of device parameters of OSCs with an inverted structure based on **PTB7 Th:tPDI Hex** blend films obtained from **TMB** without additive or annealing at 3:7 donor/acceptor ratios under AM 1.5G illumination at 100 mW cm<sup>-2</sup>.

| Parameters       | $V_{oc}$ [V] | $J_{sc}$ [mA cm <sup>-2</sup> ] | FF [%] | PCE [%] | $R_s$ [ $\Omega$ cm <sup>2</sup> ] | $R_{sh}$ [ $\Omega$ cm <sup>2</sup> ] |
|------------------|--------------|---------------------------------|--------|---------|------------------------------------|---------------------------------------|
| 10mg/ml, 600rpm  | 0.82         | 7.20                            | 46.3   | 2.69    | 33.3                               | 625.2                                 |
| 15mg/ml, 800rpm  | 0.95         | 10.78                           | 44.6   | 4.58    | 16.6                               | 392.9                                 |
| 15mg/ml, 1000rpm | 0.95         | 10.08                           | 45.2   | 4.35    | 18.9                               | 411.8                                 |

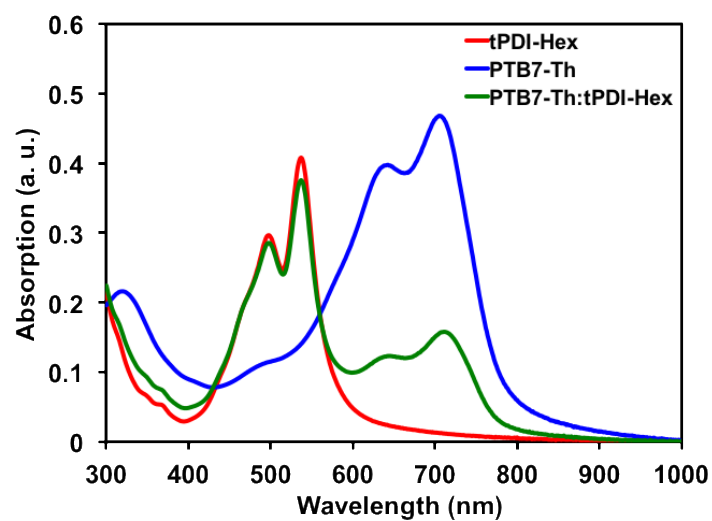

**Figure 6SI:** Optical absorption spectra of the **PTB7-Th** donor, the **tPDI-Hex** acceptor and the **PTB7-Th:tPDI-Hex** active layer obtained from **TMB** at 3:7 donor/acceptor ratios (15mg/ml, 800rpm, device PCE = 4.6%)

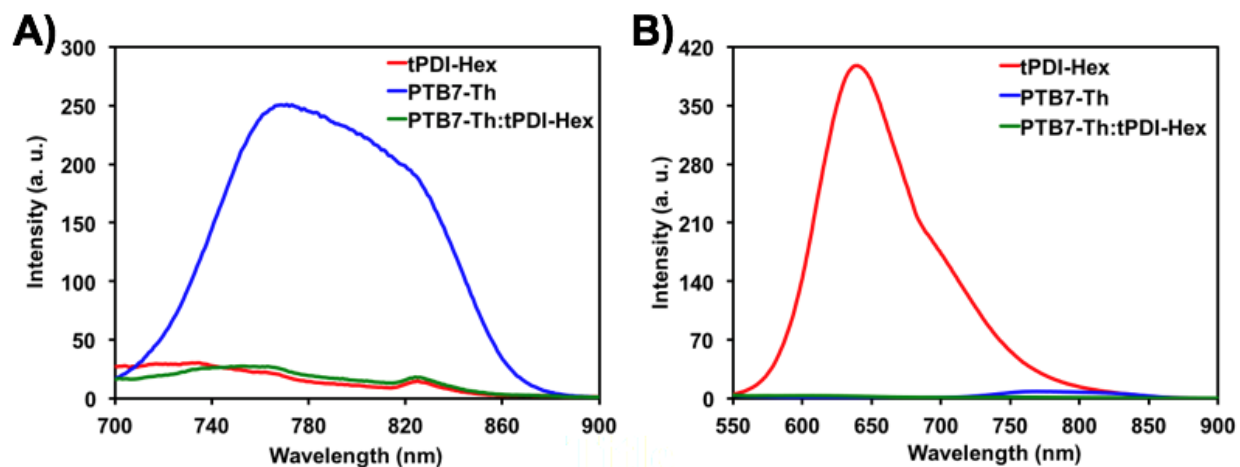

**Figure 7SI: A)** The photoluminescence spectra of **tPDI-Hex**, **PTB7-Th** and BHJ films with 3:7 ratios (15mg/ml, 800rpm, device PCE = 4.6%) obtained from **TMB** at excitation wavelength 630 nm. **B)** The photoluminescence spectra of **tPDI-Hex**, **PTB7-Th** and BHJ films with 3:7 ratios obtained from **TMB** at excitation wavelength 530 nm.

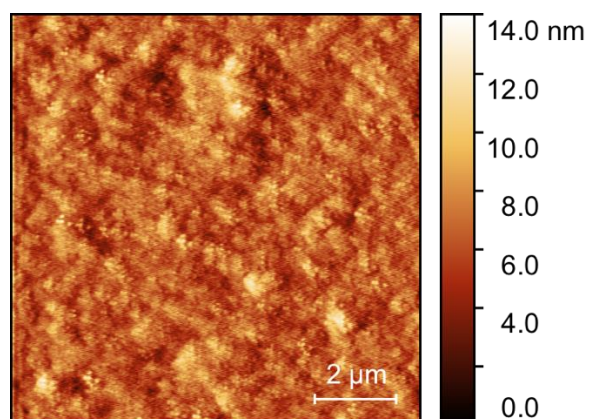

**Figure 8SI:** The non-contact AFM surface scan (size: 10x10  $\mu\text{m}$ ) of the **PTB7-Th:tPDI-Hex** film with 3:7 ratio obtained from the **TMB** (15mg/ml, 800rpm, device PCE = 4.6%) (RMS = 1.44 nm).

**Table S4.** Summary of device parameters of OSCs with an inverted structure based on **PTB7 Th:tPDI Hex** blend films obtained from CF, 2Me-THF and o-Xylene without additive or annealing at different donor/acceptor ratios under AM 1.5G illumination at 100 mW cm<sup>-2</sup>. This table is different from Table 1 as it includes the calculated series and shunt resistance data.

| Solvent  | PTB7-Th:tPDI-Hex<br>[wt/wt] | $V_{oc}$ [V] | $J_{sc}$ [mA cm <sup>-2</sup> ] | FF [%] | PCE [%] | $R_s$ [ $\Omega$ cm <sup>2</sup> ] | $R_{sh}$ [ $\Omega$ cm <sup>2</sup> ] |
|----------|-----------------------------|--------------|---------------------------------|--------|---------|------------------------------------|---------------------------------------|
| CF       | 2:3                         | 0.98         | 11.29                           | 43.1   | 4.75    | 19.3                               | 296.7                                 |
| CF       | 3:7                         | 0.97         | 10.83                           | 42.2   | 4.44    | 19.9                               | 286.0                                 |
| 2Me-THF  | 2:3                         | 0.91         | 12.30                           | 41.2   | 4.65    | 16.4                               | 222.5                                 |
| 2Me-THF  | 3:7                         | 0.94         | 11.63                           | 43.7   | 4.78    | 15.3                               | 313.8                                 |
| o-Xylene | 2:3                         | 0.93         | 10.88                           | 46.8   | 4.73    | 13.1                               | 345.1                                 |
| o-Xylene | 3:7                         | 0.95         | 10.61                           | 50.0   | 4.81    | 12.4                               | 391.9                                 |

## References:

1. D. J. Burke and D. J. Lipomi, *Energy Environ. Sci.*, 2013, **6**, 2053–2066.
2. W.-Y. Lee, G. Giri, Y. Diao, C. J. Tassone, J. R. Matthews, M. L. Sorensen, S. C. B. Mannsfeld, W.-C. Chen, H. H. Fong, J. B.-H. Tok, M. F. Toney, M. He and Z. Bao, *Adv. Funct. Mater.*, 2014, **24**, 3524–3534.
3. V. Ramanathan, *Science*, 1975, **190**, 50.
4. A. D. Hendsbee, J.-P. Sun, W. K. Law, H. Yan, I. G. Hill, D. M. Spasyuk and G. C. Welch, *Chem. Mater.*, 2016, **28**, 7098–7109.
5. G. Klebe, F. Graser, E. Hädicke and J. Berndt, *Acta Crystallogr. Sect. B*, 1989, **45**, 69–77.
6. Z. Chen, V. Stepanenko, V. Dehm, P. Prins, L. D. A. Siebbeles, J. Seibt, P. Marquetand, V. Engel and F. Würthner, *Chem. – Eur. J.*, 2007, **13**, 436–449.
